# Supplementary material
Source: publisher figshare collection journal article supplement (https://springernature.figshare.com/ndownloader/files/18614813)
Supplement: Supplementary file 1 [file 18614813]

## Sheet: Sheet 1_111 Literature hits
111 Literature hits
Author	Title	Chemicals
Afrikanova et al	Validation of the Zebrafish Pentylenetetrazol Seizure Model: Locomotor versus Electrographic Responses to Antiepileptic Drugs	ptz
Airhart et al	Movement disorders and neurochemical changes in zebrafish larvae after bath exposure to fluoxetine (PROZAC)	fluoxetine
Ali et al	Behavioral profiling of zebrafish embryos exposed to a panel of 60 water-soluble compounds	aconitine	atropine	nicotine	yohimbine hydrochloride	digitoxin	ethanol	acetic acid	paracetamol	chlorpromazine	isonazid	phenol	dimethyl sulfoxide	formaldehyde	colchicine	strychnine	coumarin	streptomycin	glycerol
Altenhofen et al	Tebuconazole alters morphological, behavioral and neurochemical parameters in larvae and adult zebrafish (Danio rerio)	tebuconazole
Andrade et al	Carbendazim exposure induces developmental, biochemical and behavioural disturbance in zebrafish embryos	carbendazim
Anichtchik et al	Neurochemical and behavioural changes in zebrafish Danio rerio after systemic administration of 6-hydroxydopamine and 1-methyl-4-phenyl-1,2,3,6-tetrahydropyridine	6-hydroxydopamine	1-methyl-4-phenyl-1,2,3,6-tetrahydropyridine
Bailey et al	Persistent behavioral effects following early life exposure to retinoic acid or valproic acid in zebrafish	retinoic acid	valproate
Baxendale et al	Identification of compounds with anti-convulsant properties in a zebrafish model of epileptic seizures	ptz
Berghmans et al	Zebrafish offer the potential for a primary screen to identify a wide variety of potential anticonvulsants	aspirin	carbamazepine	ethosuximide	diazepam	levetiracetam	lamotrigine	gabapentin	oxcarbazepine	phenytoin	primidone	tiagabine	topiramate	valproate	zonisamide	ptz
Bjornsdotter et al	Bisphenol A alternatives in thermal paper from the Netherlands, Spain, Sweden and Norway. Screening and potential toxicity	bisphenol a	bisphenol-s	2,4 bisphenol-s	TGSA	D-8
Boehmer et al	D4 Dopamine receptor genes of zebrafish and effects of the antipsychotic clozapine on larval swimming behaviour	clozapine
Bridi et al	Glyphosate and Roundup (R) alter morphology and behavior in zebrafish	glyphosate
Bugel and Tanguay	Multidimensional chemobehavior analysis of flavonoids and neuroactive compounds in zebrafish	flavonoids	caffeine	chlorpyrifos	methamphetamine	nicotine	picrotoxin	dopamine	fluoxetine	imidacloprid	ketamine	MS-222	epinephrine	carbamazepine	ethanol	valproate	ptz	quercetin	resveratrol	GABA
Cassar et al	Measuring drug absorption improves interpretation of behavioral responses in a larval zebrafish locomotor assay for predicting seizure liability	picrotoxin
Chen et al	TBBPA exposure during a sensitive developmental window produces neurobehavioral changes in larval zebrafish	TBBPA
Chen et al	BDE-47 disrupts axonal growth and motor behavior in developing zebrafish	BDE-47
Chen et al	Developmental exposures to ethanol or dimethylsulfoxide at low concentrations alter locomotor activity in larval zebrafish: Implications for behavioral toxicity bioassays	ethanol	dimethylsulfoxide
Chen et al	Effects of Dechlorane Plus exposure on axonal growth, musculature and motor behavior in embryo-larval zebrafish	dechlorane
Chen et al	Acute exposure to DE-71: Effects on locomotor behavior and developmental neurotoxicity in zebrafish larvae	DE-71
Cheng et al	Tris(1,3-dichloro-2-propyl) phosphate disrupts axonal growth, cholinergic system and motor behavior in early life zebrafish	TDCIPP
Copmans et al	A KNIME-Based Analysis of the Zebrafish Photomotor Response Clusters the Phenotypes of 14 Classes of Neuroactive Molecules	isoproterenol	apomorphine	diazepam
Cowden et al	Developmental exposure to valproate and ethanol alters locomotor activity and retino-tectal projection area in zebrafish embryos	valproate	ethanol
Dale et al	Vitamin E reduces endosulfan-induced toxic effects on morphology and behavior in early development of zebrafish (Danio rerio)	endosulfan
de Esch et al	Locomotor activity assay in zebrafish larvae: Influence of age, strain and ethanol	ethanol
Ek et al	Behavioral Analysis of Dopaminergic Activation in Zebrafish and Rats Reveals Similar Phenotypes	apomorphine
Ellis and Soanes	A larval zebrafish model of bipolar disorder as a screening platform for neuro-therapeutics	ptz
Ellis et al	Distinct models of induced hyperactivity in zebrafish larvae	ptz	aconitine	4-aminopyridine
Felix et al	Morphological and behavioral responses of zebrafish after 24 h of ketamine embryonic exposure	ketamine
Fetter et al	Comparative analysis of goitrogenic effects of phenylthiourea and methimazole in zebrafish embryos	methimazole	phenylthiourea
Fraser et al	Toxicant induced behavioural aberrations in larval zebrafish are dependent on minor methodological alterations	bisphenol a	TBBPA
Fraser et al	Endocrine disruptors affect larval zebrafish behavior: Testing potential mechanisms and comparisons of behavioral sensitivity to alternative biomarkers	estradiol	nonylphenol	bisphenol a	bisphenol-s	testosterone	linuron	thyroxine	progesterone	drospirenone	cortisol	flutamide	fluvestrant	nilutamide	fadrozole
Fraysse et al	Development of a zebrafish 4-day toxicity of embryo-larval bioassay to assess chemicals	propranolol	malathion
Gauthier et al	Nonlinear mixed-modelling discriminates the effect of chemicals and their mixtures on zebrafish behavior	isoproterenol	serotonin	ethanol
Giacomini et al	Antipsychotics produce locomotor impairment in larval zebrafish	haloperidol	olanzapine	fluphenazine
Glazer et al	Developmental exposure to low concentrations of two brominated flame retardants, BDE-47 and BDE-99, causes life-long behavioral alterations in zebrafish	BDE-99	BDE-47	chlorpyrifos
Guo et al	Influences of acute ethanol exposure on locomotor activities of zebrafish larvae under different illumination	ethanol
Irons et al	Acute administration of dopaminergic drugs has differential effects on locomotion in larval zebrafish	apomorphine	SKF-38393	quinpirole	butaclamol	haloperidol	SCH-23390
Irons et al	Acute neuroactive drug exposures alter locomotor activity in larval zebrafish	ethanol	cocaine	d-amphetamine
Jarema et al	Acute and developmental behavioral effects of flame retardants and related chemicals in zebrafish	TDCIPP	TPHP	TMPP	IPP	BPDP	EHDP	IDDP	TOCP	BDE-47	TBBPA	TCEP	chlorpyrifos
Ji et al	Behavioural responses of zebrafish larvae to acute ethosuximide exposure	ethosuximide
Jiang et al	Tris (2-butoxyethyl) phosphate affects motor behavior and axonal growth in 1 zebrafish (Danio rerio) larvae	TBOEP
Jin et al	The fungicide imazalil induces developmental abnormalities and alters locomotor activity during early developmental stages in zebrafish	imazalil
Jin et al	The toxicity of chlorpyrifos on the early life stage of zebrafish: A survey on the endpoints at development, locomotor behavior, oxidative stress and immunotoxicity	chlorpyrifos
Jin et al	Developmental toxicity of bifenthrin in embryo-larval stages of zebrafish	bifenthrin
Khan et al	Vincristine and bortezomib cause axon outgrowth and behavioral defects in larval zebrafish	vincristine	bortezomib
Kienle et al	Behavioural and developmental toxicity of chlorpyrifos and nickel chloride to zebrafish (Danio rerio) embryos and larvae	chlorpyrifos
Kirla et al	From the Cover: Zebrafish Larvae Are Insensitive to Stimulation by Cocaine: Importance of Exposure Route and Toxicokinetics	cocaine
Kirla et al	Importance of Toxicokinetics to Assess the Utility of Zebrafish Larvae as Model for Psychoactive Drug Screening Using Meta-Chlorophenylpiperazine (mCPP) as Example	meta-Chlorophenylpiperazine (mCPP)
Knecht et al	Developmental benzo[a]pyrene (B[a]P) exposure impacts larval behavior and impairs adult learning in zebrafish	benzo a pyrene
Kokel et al	Rapid behavior-based identification of neuroactive small molecules in the zebrafish	diazepam	clenbuterol	isoproterenol	epinepherine	salbutamol	cimaterol	propranolol	bopindolol	aconitine	veratridine	digitoxigenin	strophanthidinic acid	bendiocarb	methomyl	carbofuran	aldicarb	apomorphine	azinphos methyl
Kristofco et al	Age matters: Developmental stage of Danio rerio larvae influences photomotor response thresholds to diazinion or diphenhydramine	diazinon	diphenhydramine
Kung et al	Developmental Deltamethrin Exposure Causes Persistent Changes in Dopaminergic Gene Expression, Neurochemistry, and Locomotor Activity in Zebrafish	delthametrin
Lange et al	Pharmacological analysis of zebrafish lphn3.1 morphant larvae suggests that saturated dopaminergic signaling could underlie the ADHD-like locomotor hyperactivity	apomorphine	quinpirole	haloperidol	eticlopride	SKF-38393	SCH-23390
Levin et al	Developmental chlorpyrifos effects on hatchling zebrafish swimming behavior	chlorpyrifos
Li et al	A protective role of autophagy in TDCIPP-induced developmental neurotoxicity in zebrafish larvae	TDCIPP	chlorpyrifos
Li et al	Characterization of the locomotor activities of zebrafish larvae under the influence of various neuroactive drugs	ptz	MK-801	valproate	yohimbine hydrochloride	5,5-diphenylhydantoin sodium salt	sulpiride
Li et al	Differential behavioral responses of zebrafish larvae to yohimbine treatment	yohimbine
Liu et al	Atrazine and its main metabolites alter the locomotor activity of larval zebrafish (Danio rerio)	atrazine
Liu et al	Developmental toxicity and neurotoxicity of synthetic organic insecticides in zebrafish (Danio rerio): A comparative study of deltamethrin, acephate, and thiamethoxam	delthametrin	acephate	thiometoxam
Liu et al	Effects of diphenylhydantoin on locomotion and thigmotaxis of larval zebrafish	diphenylhydantoin
Long et al	Identification of Marine Neuroactive Molecules in Behaviour-Based Screens in the Larval Zebrafish	ptz
Lopez-Luna et al	Reduction in activity by noxious chemical stimulation is ameliorated by immersion in analgesic drugs inzebrafish	acetic acid	citric acid
Lopez-Patino et al	Anxiogenic effects of cocaine withdrawal in zebrafish	cocaine
Martinez et al	In vivo study of teratogenic and anticonvulsant effects of antiepileptics drugs in zebrafish embryo and larvae	valproate	levetiracetam	lamotrigine	phenobarbital	phenytoin	carbamazepine
Massarsky et al	Exposure to 1,2-Propanediol Impacts Early Development of Zebrafish (Danio rerio) and Induces Hyperactivity	propanediol
Matsumoto et al	Carbonic Anhydrase Inhibitors Induce Developmental Toxicity During Zebrafish Embryogenesis, Especially in the Inner Ear	ethoxyzolamide	acetazolamide	dorzolamide
McNeil et al	Physiological and Behavioral Effects of Exposure to Environmentally Relevant Concentrations of Prednisolone During Zebrafish (Danio rerio) Embryogenesis	prednisolone
Mora-Zamorano et al	The Nicotine-Evoked Locomotor Response: A Behavioral Paradigm for Toxicity Screening in Zebrafish (Danio rerio) Embryos and Eleutheroembryos Exposed to Methylmercury	nicotine
Noyes et al	Advanced Morphological - Behavioral Test Platform Reveals Neurodevelopmental Defects in Embryonic Zebrafish Exposed to Comprehensive Suite of Halogenated and Organophosphate Flame Retardants	TDCIPP	TPHP	TMPP	IPP	BPDP	EHDP	IDDP	TOCP	BDE-47	TBBPA	TCEP	BDP	DPP	Mitp	RDP	TBP	TBEP	TEHP	dechlorane	TCPP	DE-71	TBB	TBPH	BDE-99	BDE-100	BDE-15	BDE-3	DE-79
Nusser et al	A sensitive biomarker for the detection of aquatic contamination based on behavioral assays using zebrafish larvae	permethrin
Oliveri et al	Developmental exposure to an organophosphate flame retardant alters later behavioral responses to dopamine antagonism in zebrafish larvae	TDCIPP
Oliveri et al	Developmental exposure to organophosphate flame retardants causes behavioral effects in larval and adult zebrafish	TDCIPP	TPHP	chlorpyrifos
Peng et al	Anxiety-related behavioral responses of pentylenetetrazole-treated zebrafish larvae to light-dark transitions	ptz
Raftery and Volz	Abamectin induces rapid and reversible hypoactivity within early zebrafish embryos	abamectin	fipronil	endosulfan
Raftery et al	High-Content Screening Assay for Identification of Chemicals Impacting Spontaneous Activity in Zebrafish Embryos	nicotine	paraoxon	rotenone	abamectin	emamectin	thiram	butafenacil	pyridaben	flumetralin	fluthiacet-methyl	pyraclostrobin	propargite	fenpyroximate	tribufos	fluoxastrobin	famoxadone	pyraflufen-ethyl	Trifloxystrobin
Ramlan et al	Time dependent effect of chronic embryonic exposure to ethanol on zebrafish: Morphology, biochemical and anxiety alterations	ethanol
Reif et al	High-throughput characterization of chemical-associated embryonic behavioral changes predicts teratogenic outcomes	acetaminophen	acetic acid	aldicarb	caffeine	emamectin	endosulfan	methimazole	permethrin	nicotine	bisphenol a	phenol		retinoic acid	aspirin	phentoin	TCEP	abamectin	diazinon	TBBPA	haloperidol	carbamazepine	TDCIPP	chlorpyrifos	valproate	fipronil
Reuter et al	Developmental exposure to acetaminophen does not induce hyperactivity in zebrafish larvae	acetaminophen
Richendrfer et al	Developmental sub-chronic exposure to chlorpyrifos reduces anxiety-related behavior in zebrafish larvae	chlorpyrifos
Scheil et al	Effects of 3,4-dichloroaniline and diazinon on different biological organisation levels of zebrafish (Danio rerio) embryos and larvae	diazinon	dichloroaniline
Selderslaghs et al	Assessment of the developmental neurotoxicity of compounds by measuring locomotor activity in zebrafish embryos and larvae	acetaminophen	acrylamide	omeprazole	propyl thiouracil	saccharin	bisphenol a	chlorpromazine	Iminodipropionitrile	methimazole
Selderslaghs et al	Locomotor activity in zebrafish embryos: A new method to assess developmental neurotoxicity	chlorpyrifos
Shontz et al	Domperidone upregulates dopamine receptor expression and stimulates locomotor activity in larval zebrafish (Danio rerio)	domperidone
Spulber et al	PFOS Induces Behavioral Alterations, Including Spontaneous Hyperactivity That Is Corrected by Dexamfetamine in Zebrafish Larvae	PFOS
Steele et al	Comparative behavioral toxicology with two common larval fish models: Exploring relationships among modes of action and locomotor responses	heptanol	phenol	carvone	citalopram	diazinon	ptz	xylazine
Sun et al	Developmental exposure of zebrafish larvae to organophosphate flame retardants causes neurotoxicity	TBOEP	chlorpyrifos	TNBP	TCEP
Tanaka et al	Aroclor 1254 and BDE-47 inhibit dopaminergic function manifesting as changes in locomotion behaviors in zebrafish embryos	aroclor 1254	BDE-47
Torres-Hernandez et al	Reversal of pentylenetetrazole-altered swimming and neural activity-regulated gene expression in zebrafish larvae by valproic acid and valerian extract	ptz	valproate
Tran et al	MK-801 increases locomotor activity in a context-dependent manner in zebrafish	MK-801
Truong et al	Assessment of the developmental and neurotoxicity of the mosquito control larvicide, pyriproxyfen, using embryonic zebrafish	pyripoxyfen
Ulhaq et al	Locomotor behavior in zebrafish (Danio rerio) larvae exposed to perfluoroalkyl acids	PFOS	TFAA	PFBA	PFOA	PFNA	PFDA	PFBS
van Woudenberg et al	Zebrafish embryotoxicity test for developmental (neuro)toxicity: Demo case of an integrated screening approach system using anti-epileptic drugs	carbamazepine	valproate	ethosuximide	levetiracetam
Velki et al	Diuron and diazinon alter the behavior of zebrafish embryos and larvae in the absence of acute toxicity	diuron	diazinon
Vliet et al	Behavioral screening of the LOPAC(1280) library in zebrafish embryos	abamectin
Wang et al	THE DEVELOPMENTAL NEUROTOXICITY OF POLYBROMINATED DIPHENYL ETHERS: EFFECT OF DE-71 ON DOPAMINE IN ZEBRAFISH LARVAE	DE-71
Wang et al	Bisphenol A affects axonal growth, musculature and motor behavior in developing zebrafish	bisphenol a
Wang et al	CHARACTERIZATION OF RETINOIC ACID-INDUCED NEUROBEHAVIORAL EFFECTS IN DEVELOPING ZEBRAFISH	retinoic acid
Wang et al	Mitochondrial bioenergetics and locomotor activity are altered in zebrafish (Danio rerio) after exposure to the bipyridylium herbicide diquat	diquat
Wang et al	Paraquat affects mitochondria' bioenergetics, dopamine system expression, and locomotor activity in zebrafish (Danio rerio)	paraquat
Weichert et al	Assessing the ecotoxicity of potentially neurotoxic substances - Evaluation of a behavioural parameter in the embryogenesis of Danio rerio	abamectin	chlorpyrifos oxon	emamectin	carbamazepine
Wu et al	Microcystin-LR exposure induces developmental neurotoxicity in zebrafish embryo	microcystin
xiao et al	Relationship Between Fluoroquinolone Structure and Neurotoxicity Revealed by ZebrafishNeurobehavior	ciprofloxacin	decarboxyl-pazufloxacin	gemifloxacin	moxifloxacin	lomefloxacin	decarboxylomefloxacin	antofloxacin	antofloxacin	pefloxacin	sparfloxacin	levofloxacin	gatifloxacin
Xu et al	Early life exposure of zebrafish (Danio rerio) to synthetic pyrethroids and their metabolites: a comparison of phenotypic and behavioral indicators and gene expression involved in the HPT axis and innate immune system	permethrin	cypermethrin
Yang et al	Toxic effects of thifluzamide on zebrafish (Danio rerio)	thifluzamide
Yang et al	Effects of picrotoxin on zebrafish larvae behaviors: A comparison study with PTZ	picrotoxin	ptz
Yashwanth et al	Toxicomorphomics and toxicokinetics of quinalphos on embryonic development of zebrafish (Danio rerio) and its binding affinity towards hatching enzyme, ZHE1	quinalphos
Yozzo et al	Adverse outcome pathways during zebrafish embryogenesis: A case study with paraoxon	paraoxon
Zellner et al	Rearing conditions differentially affect the locomotor behavior of larval zebrafish, but not their response to valproate-induced developmental neurotoxicity	valproate
Zhang et al	Biological impacts of glyphosate on morphology, embryo biomechanics and larval behavior in zebrafish (Dartio rerio)	glyphosate
Zhao et al	Locomotor activity changes on zebrafish larvae with different 2,2 ',4,4 '-tetrabromodiphenyl ether (PBDE-47) embryonic exposure modes	PBDE-47	BDE-47
Zimmermann et al	Embryological exposure to valproic acid induces social interaction deficits in zebrafish (Danio rerio): A developmental behavior analysis	valproate
Additional papers from cross referencing
Xia et al 2017	Effects of ibuprofen, diclofenac and paracetamol on hatch and motor behavior in developing zebrafish (Danio rerio)	Acetaminophen
Watson et al 2014	Organophosphate pesticides induce morphological abnormalities and decrease locomotor activity and heart rate in Danio rerio and Xenopus laevis	Chlorpyrifos	Diazinon
Yen et al 2011	Differential acetylcholinesterase inhibition of chlorpyrifos, diazinon and parathion in larval zebrafish	Chlorpyrifos	Diazinon
Steenbergen et al 2011	Patterns of avoidance behaviours in the light/dark preference test in young juvenile zebrafish: A pharmacological study	Diazepam
Thomas et al 2009	Acute nicotine exposure and modulation of a spinal motor circuit in embryonic zebrafish	Nicotine
Baraban et al 2005	PENTYLENETETRAZOLE INDUCED CHANGES IN ZEBRAFISH BEHAVIOR, NEURAL ACTIVITY AND C-FOS EXPRESSION	Pentylenetetrazole (PTZ)
Leuthold et al 2019	Can Environmentally Relevant Neuroactive Chemicals Specifically Be Detected with the Locomotor Response Test in Zebrafish Embryos?	Diazinon	Endosulfan	Nicotine
Cao et al 2018	Biological impacts of organophosphates chlorpyrifos and diazinon on development, mitochondrial bioenergetics, and locomotor activity in zebrafish (Danio rerio)	Chlorpyrifos	Diazinon
Additional papers from last literature search on 29.07.2019
Dach et al 2019	Teratological and Behavioral Screening of the National Toxicology Program 91-Compound Library in Zebrafish ( Danio rerio )	Acetaminophen	Diazepam	Valproate	Chlorpyrifos
Schmitt et al 2019	Comparative analyses of the neurobehavioral, molecular, and enzymatic effects of organophosphates on embryo-larval zebrafish (Danio rerio)	Diazinon
Oliveri and Levin 2019	Dopamine D1 and D2 receptor antagonism during development alters later behavior in zebrafish	Haloperidol

## Sheet: Sheet2_31 Chemical hits
Chemical	Number of hits	Reference
BDE-47	6	Chen et al, Glazer et al, Tanaka et al, Zhao et al, Jarema et al, Noyes et al
DE-71	3	Chen et al, Wang et al, Noyes et al
TBBPA	5	Chen et al, Fraser et al, Jarema et al, Noyes et al, Reif et al
TCEP	4	Sun et al, Jarema et al, Noyes et al, Reif et al
TDCIPP	7	Cheng et al, Jarema et al, Li et al, Noyes et al, Oliveri et al, Oliveri et al, Reif et al
TPHP	3	Jarema et al, Noyes et al, Oliveri et al
abamectin	5	Raftery and Volz, Vliet et al, Weichert et al, Raftery et al, Reif et al
acetaminophen	3	Reif et al, Reuter et al, Selderslaghs et al
acetic acid	3	Lopez-Luna et al, Reif et al, Ali et al
aconitine	3	Ali et al, Ellis et al, Kokel et al
apomorphine	5	Ek et al, Irons et al, Lange et al, Copmans et al, Kokel et al
bisphenol a	6	Bjornsdotter et al, Fraser et al, Wang et al, Fraser et al, Selderslaghs et al, Reif et al
carbamazepine	6	van Woudenberg et al, Berghmans et al, Weichert et al, Martinez et al, Bugel and Tanguay, Reif et al
chlorpyrifos	11	Jin et al, Kienle et al, Levin et al, Richendrfer et al, Selderslaghs et al, Li et al, Sun et al, Bugel and Tanguay, Glazer et al, Oliveri et al, Reif et al
cocaine	3	Kirla et al, Lopez-Patino et al, Irons et al
diazepam	3	Kokel et al, Copmans et al, Berghmans et al
diazinon	5	Kristofco et al, Scheil et al, Velki et al, Steele et al, Reif et al
emamectin	3	Weichert et al, Raftery et al, Reif et al
endosulfan	3	Dale et al, Raftery and Volz, Reif et al
ethanol	9	Chen et al, de Esch et al, Guo et al, Irons et al, Ramlan et al, Cowden et al, Gauthier et al, Ali et al, Bugel and Tanguay
haloperidol	4	Giacomini et al, Lange et al, Irons et al, Reif et al
isoproterenol	3	Copmans et al, Gauthier et al, Kokel et al
levetiracetam	3	Martinez et al, van Woudenberg et al, Berghmans et al
methimazole	3	Fetter et al, Reif et al, Selderslaghs et al
nicotine	5	Mora-Zamorano et al, Raftery et al, Ali et al, Bugel and Tanguay, Reif et al
permethrin	3	Nusser et al, Xu et al, Reif et al
phenol	3	Steele et al, Ali et al, Reif et al
picrotoxin	3	Cassar et al, Yang et al, Bugel and Tanguay
pentylenetetrazole	12	Afrikanova et al, Baxendale et al, Ellis and Soanes, Ellis et al, Li et al, Long et al, Peng et al, Torres-Hernandez et al, Yang et al, Steele et al, Berghmans et al, Bugel and Tanguay
retinoic acid	3	Bailey et al, Wang et al, Reif et al
valproate	11	Cowden et al, Martinez et al, Zellner et al, Zimmermann et al, Bailey et al, Torres-Hernandez et al, van Woudenberg et al, Li et al, Berghmans et al, Bugel and Tanguay, Reif et al

## Sheet: Sheet 3_18 Chemical hits
Reference	Chemical	CAS No	Water solubility (µmol/L)	Chemical class	Mode of action	Exposure concentration µM	Hypoactivity concentration µM	Hyperactivity concentration µM	Behavioral method	Light conditions for effect	Exposure duration hpf	Developmental stage hpf	Analysis duration min	Endpoint parameter	Imaging system	Exposure vessel	Exposure media	Solvent	Zebrafish strain	statistical method	comment
Raftery and Volz 2015	Abamectin	71751-41-2	11455.8	Avermectin insecticide	Activation of GABA and glutamate gated chloride channel	0.0625, 0.125, 0.25, 0.5	0.25	-	STC		5 -25	5	0.16	Spontaneous activity	Olympus camera/imaging software	glass beaker	Embryo media (EM)	0.001	fli1:egfp or wildtype 5D	GLM Anova/Pairwise Tukey	High effect concentrations probably because of adsorption of chemical to plastic well
Raftery et al 2014	Abamectin	71751-41-2	11454.8	Avermectin insecticide	Activation of GABA and glutamate gated chloride channel	0.09, 0.19, 0.39, 0.78, 1.56, 3.13, 6.25, 12.5, 25, 50	3.125	-	STC		5 -25	5	0.1	Spontaneous activity	imageXpress Micro/Ethovision	384 well plate	Embryo media (EM)	0.001	transgenic zebrafish	Kruskal-wallis/Mann-whitney
Reif et al 2016	Abamectin	71751-41-2	11456.8	Avermectin insecticide	Activation of GABA and glutamate gated chloride channel	0.0064, 0.064, 0.64, 64	0.64	-	PMR		6-24	6	0.83	Movement index	PMR analysis tool (PRAT)	96 well plate	Embryo media (EM)	0.0064	Tropical 5D wildtype	percent change&Kolmogorov-smirnov/Bonferronni	embryos were dechorionated
Vliet et al 2017	Abamectin	71751-41-2	11457.8	Avermectin insecticide	Activation of GABA and glutamate gated chloride channel	0.09, 0.19, 0.39, 0.78, 1.56, 3.13, 6.25, 12.5, 25, 50	1.56	-	STC		5 -24	5	0.3	Spontaneous activity	imageXpress Micro/Ethovision	384 well plate	Embryo media (EM)	0.001	transgenic fli1:egfp	Kruskal-wallis/Mann-whitney
weichert et al 2017	Abamectin	71751-41-2	11458.8	Avermectin insecticide	Activation of GABA and glutamate gated chloride channel	0.058, 0.13, 0.16, 0.26, 0.36, 0.42, 0.46, 0.7, 0.99, 1.46	0.36	-	STC		0-24	0	0.5	no of spontaneous coiling/min	camera/manual counting	24 well plate	aquarium water	0.001	wild type	Mann-Whitney test/effect perecent	The hyperactivity effect concentration was reported as an outlier
Reif et al 2016	Acetaminophen	103-90-2		Analgesic drug	cyclooxygenase Inhibitors	0.0064, 0.064, 0.64, 64	-	-	PMR		6-24	6	0.83	Movement index	PMR analysis tool (PRAT)	96 well plate	Embryo media (EM)	0.0064	Tropical 5D wildtype	percent change&Kolmogorov-smirnov/Bonferronni
Reuter et al 2016	Acetaminophen	103-90-2		Analgesic drug	cyclooxygenase Inhibitors	3.3, 16.5, 66.2, 662, 3308, 6615	66.2, 662, 3308, 6615		LMR	Dark	146-144	2	5	Total distance moved	zebrabox	12 well plate	Danieau's solution	-	AB wildtype	Anova/Tukey
Reuter et al 2016	Acetaminophen	103-90-2		Analgesic drug	cyclooxygenase Inhibitors	3.3, 16.5, 66.2, 662	-	-	LMR	dark	2-146	144	5	Total distance moved	zebrabox	12 well plate	Danieau's solution	-	AB wildtype	Anova/Tukey
Selderslaghs et al 2013	Acetaminophen	103-90-2		Analgesic drug	cyclooxygenase Inhibitors	100, 210, 410, 830, 1650	-	-	LMR	dark	4-120	4	5	Total distance moved	Tracksys system/ethovision	48/96 well plate	reconstituted water	0.001	wild type	overlap area/effect percentage
Selderslaghs et al 2013	Acetaminophen	103-90-2		Analgesic drug	cyclooxygenase Inhibitors	830, 1660, 3310	-	-	STC		4-24	4	5	Frequency of spontaneous activiy	Camera/Ethovision	48/96 well plate	reconstituted water	0.001	wild type	overlap area/effect percentage
Xia et al 2017	Acetaminophen	103-90-2		Analgesic drug	cyclooxygenase Inhibitors	0.033, 0.33, 3.3	-	-	LMR	dark	120-120.3	120	10	Total distance moved	zebrabox	96 well plate	ISO water	5e-05	AB wildtype	Anova/Tukey
Xia et al 2017	Acetaminophen	103-90-2		Analgesic drug	cyclooxygenase Inhibitors	0.033, 0.33, 3.3	-	-	LMR (light/dark)	light+dark	120-121.2	120	60	Total distance moved	zebrabox	glass petridish	ISO water	5e-05	AB wildtype	Anova/Tukey
Xia et al 2017	Acetaminophen	103-90-2		Analgesic drug	cyclooxygenase Inhibitors	0.033, 0.33, 3.3	-	-	STC		6-28	6	1	Spontaneous activity	microscope	glass petridish	ISO water	5e-05	AB wildtype	Anova/Tukey
Dach et al 2019	Acetaminophen	103-90-2		Analgesic drug	cyclooxygenase Inhibitors	0.3, 1, 3, 10, 30	-	-	LMR (light/dark)	dark	6-120	6	35	Total distance moved	Noldus recording system/ethovision	96 well plate	embryo medium	0.005	Tropical 5D wildtype	Kruskal-wallis/Bonferroni test
Ali et al 2012	Aconitine	302-27-2	480	Analgesic drug	Activation of voltage gated sodium ion channel	1.55, 15.5, 77.5, 155	77.5, 155	-	LMR (light/dark)	dark	24-96	24	8	Total distance moved	zebrabox	96 well plate	Hanks solution	-	AB wildtype	Anova/Dunnetts test	Effect concentration reported here is for the dark imaging
Ellis et al 2012	Aconitine	302-27-2	480	Analgesic drug	Activation of voltage gated sodium ion channel	1, 2.5, 5,25		1, 2.5, 5,25	LMR (light/dark)	1, light; others, light+dark	120-128	120	110	Total distance moved	zebrabox	96 well plate	E3 media	0.001	AB/Tubingen	ANOVA
Kokel et al 2010	Aconitine	302-27-2	480	Analgesic drug	Activation of voltage gated sodium ion channel	10-100	-	10/100	PMR		28-32	28	0.66	Motion index	camera/metamorph software	96 well plate	E3 media	less than 1%	Ekkwill or TuAB	Pseudo z-score normalization
Copmans et al 2016	Apomorphine	58-00-4	1640	Morphine drug	stimulation of post-synaptic dopamine D2-type receptors	12.5, 25, 50, 100	-	100	PMR		29-32	29	0.5	Total distance moved	zebrabox	96 well plate	Embryo media (EM)	0.01	AB strain	ANOVA
Ek et al 2016	Apomorphine	58-00-4	1640	Morphine drug	stimulation of post-synaptic dopamine D2-type receptors	10, 25, 50	-	50	LMR	dark	240-241	240	45	Distance moved	camera/Matlab	24 well plate	E3 media	0.001	AB wildtype	two way repeated measure anova/Tukey
Irons et al 2013	Apomorphine	58-00-4		Morphine drug	stimulation of post-synaptic dopamine D2-type receptors	0.2, 0.6, 1.8, 5.5, 16.7, 50	-	0.2, 50	LMR (light/dark)	dark	144-145.2	144	70	distance per 2min	Noldus recording system/ethovision	96 well plate	Hanks solution	0.004	wild type	Anova/Fischers test
Kokel et al 2010	Apomorphine	58-00-4	1640	Morphine drug	stimulation of post-synaptic dopamine D2-type receptors	10 - 100	-	10/100 E	PMR		28-32	28	0.66	Motion index	camera/metamorph software	96 well plate	E3 media	less than 1%	Ekkwill or TuAB	Pseudo z-score normalization	single concentration
Berghmans et al 2007	Carbamazepine	298-46-4	474	anticonvulsant drug	Sodium channel blocker	30, 100, 300	100	-	LMR	dark	144-168	144	60	Total distance moved	camera/Ethovision	96 well plate	E3 media	0.01	Wik wild type	ANOVA
Bugel and Tanguay 2018	Carbamazepine	298-46-4	477	anticonvulsant drug	Sodium channel blocker	1, 10, 100, 1000	100	-	LMR	light	120-125	120	300	Total distance moved	zebrabox	96 well plate	embryo medium	0.001	Tropical 5D wildtype	two way repeated measure anova/Tukey	dechorionation
Martinez et al 2018	Carbamazepine	298-46-4	476	anticonvulsant drug	Sodium channel blocker	50, 100	-	-	LMR	dark	120-121	120	15	Total distance moved	multichannel ADC system	96 well plate	E3 media	-	not given	Anova/Dunnetts test
Reif et al 2016	Carbamazepine	298-46-4	474	anticonvulsant drug	Sodium channel blocker	0.0064, 0.064, 0.64, 64	-	-	PMR		6-24	6	0.83	Movement index	PMR analysis tool (PRAT)	96 well plate	Embryo media (EM)	0.0064	Tropical 5D wildtype	percent change&Kolmogorov-smirnov/Bonferronni	embryos were dechorionated
van Wouderberg et al 2014	Carbamazepine	298-46-4	475	anticonvulsant drug	Sodium channel blocker	30, 60, 120, 180, 240	180	-	LMR (light/dark)	dark	2-100	2	45	distance moved/15mins	zebrabox	96 well plate	aquarium water	0.002	AB wildtype	mixed model/dunnetts test
weichert et al 2017	Carbamazepine	298-46-4	474	anticonvulsant drug	Sodium channel blocker	4.23, 105, 212, 317, 423	105(58%);212(49%);317(77%)		STC		0-24	0	0.5	no of spontaneous coiling/min	camera/manual counting	24 well plate	aquarium water	0.001	wild type	Mann-Whitney test/effect perecent
Jarema et al 2015	Chlorpyrifos	2921-88-2		organophosphate insecticide	Acetylcholinesterase Inhibitor	11.5	-	11.5	LMR (light/dark)	light/dark	144-148	144	26	distance moved/2mins	Noldus recording system/ethovision	96 well plate	Hanks solution	0.004	wild type	repeated measure anova	sing;e concentration
Jarema et al 2015	Chlorpyrifos	2921-88-2		organophosphate insecticide	Acetylcholinesterase Inhibitor	11.5	11.5	-	LMR (light/dark)	dark	8-120	8	100	distance moved/2mins	Noldus recording system/ethovision	96 well plate	Hanks solution	0.004	wild type	repeated measure anova	Single concentration
Kienle et al 2009	Chlorpyrifos	2921-88-2	3.19	organophosphate insecticide	Acetylcholinesterase Inhibitor	0.03, 0.3, 0.75, 1.5	0.3, 0.75, 1.5	-	LMR	NG	24-120	1	4	Percentage of time spent on locomotion	Multispecies freshwater biomonitor	glass petridish	reconstituted water	-	WIK strain	Friedman anova/wilcoxon 2 group test	different imaging technique used
Levin et al 2004	Chlorpyrifos	2921-88-2	3.19	organophosphate insecticide	Acetylcholinesterase Inhibitor	0.03, 0.3	0.3	-	LMR	NG	24-120	24	5	segment crossing/min	camera	special chambers	Ringers solution	not given	AB strain	Anova/Dunnetts test	exposure solution renewed daily
Richendrfer et al 2012	Chlorpyrifos	2921-88-2	3.19	organophosphate insecticide	Acetylcholinesterase Inhibitor	0.001, 0.01, 0.1	0.01, 0.1	-	LMR	NG	0-168	2	60	Swim speed	camera/time-lapse imaging software	6 well plate	Ringers solution	0.001	wild type	Anova/Tukey
Selderslaghs et al 2010	Chlorpyrifos	2921-88-2	3.19	organophosphate insecticide	Acetylcholinesterase Inhibitor	0.13, 0.27, 0.53, 1.1, 2.14	2.14	-	LMR	dark	4-120	4	5	mean turn angle/total duration of movement	Tracksys system/ethovision	48 well plate	reconstituted water	0.001	wild type	Overlap area/2-tailed T-test
Selderslaghs et al 2010	Chlorpyrifos	2921-88-2	3.19	organophosphate insecticide	Acetylcholinesterase Inhibitor	0.11 , 0.44, 1.8, 7.1, 28.5	-	1.8, 7.1, 28.5	STC		4-24	4	5	Frequency of spontaneous activiy	Camera/Ethovision	6/96 well plate	reconstituted water	0.001	wild type	Overlap area/2-tailed T-test
Watson et al 2014	Chlorpyrifos	2921-88-2	3.19	organophosphate insecticide	Acetylcholinesterase Inhibitor	0.1, 1, 10	10	-	LMR	NG	2-120	2	1	no of times larvae crossed a grid line	microscopic observation	petridish	ringers solution	0.4% methanol	not given	Anova
Watson et al 2014	Chlorpyrifos	2921-88-2	3.19	organophosphate insecticide	Acetylcholinesterase Inhibitor	0.1, 1, 10	-	1,10	STC		2-24	2	1	no of spontaneous movement/min	microscopic observation	petridish	ringers solution	0.4% methanol	not given	Anova
Yen et al 2011	Chlorpyrifos	2921-88-2	3.19	organophosphate insecticide	Acetylcholinesterase Inhibitor	0.3	0.3	-	LMR	light	6 -120	6	2	Total distance moved	Noldus Ethovision 3.0	glass beaker/9 well plate	Danieau's solution	0.001	AB wildtype	Anova/Fischers test
Bugel and Tanguay 2018	Chlorpyrifos	2921-88-2		organophosphate insecticide	Acetylcholinesterase Inhibitor	1, 10, 100	-	1, 10	LMR	light	120-122	120	120	Total distance moved	zebrabox	96 well plate	embryo medium	0.001	Tropical 5D wildtype	two way repeated measure anova/Tukey	dechorionation
Bugel and Tanguay 2018	Chlorpyrifos	2921-88-2		organophosphate insecticide	Acetylcholinesterase Inhibitor	1, 10, 100	100	-	LMR	light	120-125	120	300	Total distance moved	zebrabox	96 well plate	embryo medium	0.001	Tropical 5D wildtype	two way repeated measure anova/Tukey	dechorionation
Cao et al 2018	Chlorpyrifos			organophosphate insecticide	Acetylcholinesterase Inhibitor	0.1, 1.0	1	-	LMR (light/dark)	dark	6-168	6	50	Total distance moved	Noldus recording system/ethovision	glass beaker	Embryo media (EM)	0.001	AB wildtype	Anova/Dunnetts test
Glazer et al 2017	Chlorpyrifos	2921-88-2		organophosphate insecticide	Acetylcholinesterase Inhibitor	0.3	0.3	-	LMR (light/dark)	dark	5-120	5	50	Total distance moved	Noldus recording system/ethovision	petridish	system water	0.001	AB wildtype	two way Anova/Dunnett	Imaging at 6dpf
Jin et al 2015	Chlorpyrifos	2921-88-2	4.19	organophosphate insecticide	Acetylcholinesterase Inhibitor	0.029, 0.086, 0.29, 0.86	0.86	-	LMR	light	2-96	2	30	Total distance moved	zebrabox	96 well plate	water	not given	not given	Anova/Fischers test
Jin et al 2015	Chlorpyrifos	2921-88-2		organophosphate insecticide	Acetylcholinesterase Inhibitor	0.029, 0.086, 0.29, 0.87	0.29, 0.87	-	LMR (light/dark)	0.29 dark; 0.87 light	2-96	2	40	Total distance moved	zebrabox	96 well plate	water	not given	not given	Anova/Fischers test
Li et al 2018	Chlorpyrifos	2921-88-2		organophosphate insecticide	Acetylcholinesterase Inhibitor	0.29	0.29	-	LMR (light/dark)	dark	2-120	2	20	average speed	zebrabox	glass beaker	water	-	AB strain	Anova/Tukey
Oliveri et al 2015	Chlorpyrifos	2921-88-2		organophosphate insecticide	Acetylcholinesterase Inhibitor	0.03, 0.3	-	0.03	LMR (light/dark)	dark	5-120	5	50	Total distance moved	Noldus recording system/ethovision	petridish	aquarium water	0.0003	AB strain	mixed-design repeated/Dunnett	Imaging at 6dpf, daily change of solution
Reif et al 2016	Chlorpyrifos	2921-88-2	3.19	organophosphate insecticide	Acetylcholinesterase Inhibitor	0.0064, 0.064, 0.64, 64	64	-	PMR		6-24	6	0.83	Movement index	PMR analysis tool (PRAT)	96 well plate	Embryo media (EM)	0.0064	Tropical 5D wildtype	percent change&Kolmogorov-smirnov/Bonferronni	embryos were dechorionated
Sun et al 2016	Chlorpyrifos	2921-88-2		organophosphate insecticide	Acetylcholinesterase Inhibitor	0.029, 0.086, 0.29, 0.87	0.86	-	LMR	light	2-120	2	30	average speed	zebrabox	96 well plate	-	0.0001	not given	Anova/Dunnetts test
Sun et al 2016	Chlorpyrifos	2921-88-2		organophosphate insecticide	Acetylcholinesterase Inhibitor	0.029, 0.086, 0.29, 0.87	0.086, 0.29, 0.87	-	LMR (light/dark)	0.086 dark, 0.87 light	2-120	2	30	average speed	zebrabox	96 well plate	-	0.0001	not given	Anova/Dunnetts test
Dach et al 2019	Chlorpyrifos	2921-88-2		organophosphate insecticide	Acetylcholinesterase Inhibitor	0.3, 1, 3, 10, 30	10, 30	-	LMR (light/dark)	dark	6-120	6	35	Total distance moved	Noldus recording system/ethovision	96 well plate	embryo medium	0.005	Tropical 5D wildtype	Kruskal-wallis/Bonferroni test
Berghmans et al 2007	Diazepam	439-14-5	176	anticonvulsant drug	Stimulates GABA receptor	5, 16, 50	50	-	LMR	dark	144-168	144	60	Total distance moved	camera/Ethovision	96 well plate	E3 media	0.01	Wik wild type	ANOVA
Copmans et al 2016	Diazepam	439-14-5	176	anticonvulsant drug	Stimulates GABA receptor	12.5, 25, 50, 100	100	-	PMR		28-32	28	0.5	Total distance moved	zebrabox	96 well plate	Embryo media (EM)	0.01	AB strain	ANOVA
Kokel et al 2010	Diazepam	439-14-5	176	anticonvulsant drug	Stimulates GABA receptor	10-100	100	-	PMR		28-32	28	0.66	Motion index	camera/metamorph software	96 well plate	E3 media	less than 1%	Ekkwill or TuAB	Pseudo z-score normalization
Steenbergen et al 2011	Diazepam	439-14-5	176	anticonvulsant drug	Stimulates GABA receptor	2.5	-	-	LMR (light/dark preference test)	NA	144-144.1	144	5	Duration spent in dark zone	zebralab	plastic tank (45x30x21mm)	ringers solution/ocean water	5e-05	AB wildtype	Anova/Tukey	no effect on locomotion but observable effect on light/dark preference test; only one concentration tested
Dach et al 2019	Diazepam	439-14-5	177	anticonvulsant drug	Stimulates GABA receptor	0.3, 1, 3, 10, 30	1		LMR (light/dark)	dark	6-120	6	35	Total distance moved	Noldus recording system/ethovision	96 well plate	embryo medium	0.005	Tropical 5D wildtype	Kruskal-wallis/Bonferroni test
Cao et al 2018	Diazinon	333-41-5		organophosphate insecticide	Acetylcholinesterase Inhibitor	0.1, 1.0, 10	-	-	LMR (light/dark)	dark	6-168	6	50	Total distance moved	Noldus recording system/ethovision	glass beaker	Embryo media (EM)	0.001	AB wildtype	Anova/Dunnetts test
Kristofco et al 2016	Diazinon	333-41-5	131	organophosphate insecticide	Acetylcholinesterase Inhibitor	0.0056, 0.06, 0.57, 4.1	0.0055	-	LMR (light/dark)	dark	24-72	24	50	Mean distance/min	zebrabox	24 well plate	Ringers solution	-	Tropical 5D wildtype	Anova/Dunnetts test
Leuthold et al 2019	Diazinon	333-41-5		organophosphate insecticide	Acetylcholinesterase Inhibitor	2.7, 3.6, 5.4, 7.2, 10.8, 14.4, 21.6, 28.9, 43.3, 57.7, 86.6, 105.4	86.6, 105.4	21.6, 28.9, 43.3, 57.7	LMR (light/dark)	light	96-118.5	96	80	Total distance moved	zebrabox	96 well plate	ISO water	0.1% methanol	OBI wildtype	confidence interval estimation
Reif et al 2016	Diazinon	333-41-5	131	organophosphate insecticide	Acetylcholinesterase Inhibitor	0.0064, 0.064, 0.64, 6.4, 64	6.4	-	PMR		6-24	6	0.83	Movement index	PMR analysis tool (PRAT)	96 well plate	Embryo media (EM)	0.0064	Tropical 5D wildtype	Percent change&Kolmogorov-smirnov/Bonferronni
Scheil et al 2008	Diazinon	333-41-5	131	organophosphate insecticide	Acetylcholinesterase Inhibitor	0.03, 0.3, 1.64, 3.3, 6.6	6.57	-	LMR	light	2-120	2	4	Percentage of time spent on locomotion	Multispecies freshwater biomonitor	glass petridish	reconstituted water	-	WIK	Friedman anova/wilcoxon 2 group test	malformations not excluded
Steele et al 2018	Diazinon	333-41-5	131	organophosphate insecticide	Acetylcholinesterase Inhibitor	0.009, 0.11, 0.56, 0.92, 3.61	0.11	-	LMR (light/dark)	dark	6-96	6	50	Total distance moved	zebrabox	beaker	reconstituted water	0.0001	Tropical 5D wildtype	Anova/Dunnetts test
Velki et al 2017	Diazinon	333-41-5	131	organophosphate insecticide	Acetylcholinesterase Inhibitor	3.3 , 6.6, 11.5	-	-	LMR (light/dark)	light/dark	2-120	2	16	Total distance moved	DanioVision chamber/ethovision	glass vessel/96 well plate	reconstituted water	0.001	wild type	Anova/Dunnetts test	Hypoactivity trend but not significant due to probably high variation in controls
Velki et al 2017	Diazinon	333-41-5	131	organophosphate insecticide	Acetylcholinesterase Inhibitor	3.3 , 6.6, 11.5	-	-	STC		2-24	2	1	no of spontaneous coiling/min	inverted microscope	glass vessel/96 well plate	reconstituted water	0.001	wild type	Anova/Dunnetts test	daily renewal of solution for the tests
Watson et al 2014	Diazinon	333-41-5	131	organophosphate insecticide	Acetylcholinesterase Inhibitor	0.1, 1, 10	-	-	LMR	NG	2-120	2	1	no of times larvae crossed a grid line	microscopic observation	petridish	ringers solution	0.4% methanol	not given	Anova
Watson et al 2014	Diazinon	333-41-5	131	organophosphate insecticide	Acetylcholinesterase Inhibitor	0.1, 1, 10	-	-	STC		2-24	2	1	no of spontaneous movement/min	microscopic observation	petridish	ringers solution	0.4% methanol	not given	Anova
Yen et al 2011	Diazinon	333-41-5	131	organophosphate insecticide	Acetylcholinesterase Inhibitor	0.3, 10	10	-	LMR	light	6 -120	6	2	Total distance moved	Noldus Ethovision 3.1	9 well clear spot plate	Danieau's solution	0.001	AB wildtype	Anova/Fischers test
Schmitt et al 2019	Diazinon	333-41-5	132	organophosphate insecticide	Acetylcholinesterase Inhibitor	0.00003.3, 0.0003.3, 0.003.3, 0.033, 0.33	0.33		LMR (light/dark)	light/dark	5-120	5	50	Total distance moved	Noldus Ethovision 3.1	24 well plate	egg water	less than 0.1% ethanol	wild type 5D	Anova/Tukey
Raftery et al 2014	Emamectin Benzoate	155569-91-8	23.8	Avermectin insecticide	Activation of GABA and glutamate gated chloride channel	0 .09, 0.19, 0.39, 0.78, 1.56, 3.13, 6.3, 12.5, 25, 50	25	-	STC		5 -25	5	0.1	Percentage Spontaneous activity	imageXpress Micro/Ethovision	385 well plate	Embryo media (EM)	0.001	transgenic zebrafish	Kruskal-wallis/Mann-whitney
Reif et al 2016	Emamectin Benzoate	155569-91-8	23.8	Avermectin insecticide	Activation of GABA and glutamate gated chloride channel	0.0064, 0.064, 0.64, 64	0.0064, 0.64	-	PMR		6-24	6	0.83	Movement index	PMR analysis tool (PRAT)	96 well plate	Embryo media (EM)	0.0064	Tropical 5D wildtype	percent change&Kolmogorov-smirnov/Bonferronni	embryos were dechorionated
weichert et al 2017	Emamectin benzoate	155569-91-8	23.8	Avermectin insecticide	Activation of GABA and glutamate gated chloride channel	0.16, 0.52, 0.88, 1.24, 1.6	0.52, 0.88	-	STC		0-24	0	0.5	no of spontaneous coiling/min	camera/manual counting	24 well plate	aquarium water	0.001	wild type	Mann-Whitney test/effect perecent
Dale et al 2017	Endosulfan	115-29-7		Organochlorine insecticide	GABA-gated chloride channel antagonist	0.25, 1.23, 2.5	-	1.23	LMR (light/dark)	light+dark	6-72	6	10	Total distance moved	zebrabox	24 well plate	E3 media	0.01	AB/TLF	Anova/Tukey	test at 120hpf
Leuthold et al 2019	Endosulfan	115-29-7		Organochlorine insecticide	GABA-gated chloride channel antagonist	0.003, 0.006, 0.012, 0.025, 0.05, 0.1, 0.2, 0.4, 0.8	0.05, 0.1, 0.2, 0.4	0.05, 0.1, 0.2, 0.8	LMR (light/dark)	hyper:light; hypo: dark	96-118.5	96	80	Total distance moved	zebrabox	96 well plate	ISO water	0.1% methanol	OBI wildtype	confidence interval estimation
Raftery and Volz 2015	Endosulfan	115-29-7		Organochlorine insecticide	GABA-gated chloride channel antagonist	0.625, 0.125, 0.25, 5	5	-	STC		5 -25	5	0.16	Spontaneous activity	Olympus camera/imaging software	glass beaker	Embryo media (EM)	0.001	fli1:egfp or wildtype 5D	GLM Anova/Pairwise Tukey
Reif et al 2016	Endosulfan	115-29-7		Organochlorine insecticide	GABA-gated chloride channel antagonist	0.0064, 0.064, 0.64, 64	-	-	PMR		6-24	6	0.83	Movement index	PMR analysis tool (PRAT)	96 well plate	Embryo media (EM)	0.0064	Tropical 5D wildtype	percent change&Kolmogorov-smirnov/Bonferronni
Giacomini et al 2006	Haloperidol	52-86-8		antipsychotic drug	Dopamine receptor antagonist	9	9	-	LMR	light	168-170	168	5	speed	camera/DIAS	-	Instant ocean salt	0.0001	not given	Anova/Dunnetts test
Irons et al 2013	Haloperidol	52-86-8		antipsychotic drug	Dopamine receptor antagonist	0.2, 0.6, 1.8, 5.5, 16.7, 50	16.7, 50	5.5	LMR (light/dark)	16.7, dark; 5.5, light	144-145.2	144	70	distance per 2min	Noldus recording system/ethovision	96 well plate	Hanks solution	0.004	wild type	Anova/Fischers test
Reif et al 2016	Haloperidol	52-86-8		antipsychotic drug	Dopamine receptor antagonist	0.0064, 0.064, 0.64, 64	-	-	PMR		6-24	6	0.83	Movement index	PMR analysis tool (PRAT)	96 well plate	Embryo media (EM)	0.0064	Tropical 5D wildtype	percent change&Kolmogorov-smirnov/Bonferronni
Oliveri and Levin 2019	Haloperidol	52-86-8		antipsychotic drug	Dopamine receptor antagonist	0.5, 1.5	-	-	LMR (light/dark)	dark	5-120	5	50	Total distance moved	DanioVision chamber/ethovision	96 well plate	aquarium water		AB	RMANOVA/Fischers test
Oliveri and Levin 2019	Haloperidol	52-86-8		antipsychotic drug	Dopamine receptor antagonist	0.5, 1.5	-	0.5, 1.5	LMR (light/dark)	dark	5-120	5	50	Total distance moved	DanioVision chamber/ethovision	96 well plate	aquarium water		5D	RMANOVA/Fischers test
Copmans et al 2016	Isoproterenol	7683-59-2		bronchodilator drug	beta-adrenergic receptor agonists	12.5, 25, 50, 100	-	100	PMR		28-32	27	0.5	Total distance moved	zebrabox	96 well plate	Embryo media (EM)	0.01	AB strain	ANOVA
Gauthier and Vijayan 2018	Isoproterenol	7683-59-2		bronchodilator drug	beta-adrenergic receptor agonists	20	20	-	LMR (light/dark)	light+dark	80-81.5	80	90	Total distance moved	zebrabox	96 well plate	Embryo media (EM)	-	Tupfel long fin	non linear mixed model	dechorionation
Gauthier and Vijayan 2018	Isoproterenol	7683-59-2		bronchodilator drug	beta-adrenergic receptor agonists	100	-	100	PMR		32-32.5	32	0.5	Total activity	zebrabox	96 well plate	Embryo media (EM)	-	Tupfel long fin	non linear mixed model	dechorionation
Kokel et al 2010	Isoproterenol	7683-59-2		bronchodilator drug	beta-adrenergic receptor agonists	1, 10, 100	-	BER	PMR		28-32	28	0.66	Motion index	camera/metamorph software	96 well plate	E3 media	less than 1%	Ekkwill or TuAB	Pseudo z-score normalization
Berghmans et al 2007	levetiracetam	102767-28-2		anticonvulsant drug	Inhibits volatge dependent calcium channel	10000, 30000, 100000	100000	-	LMR	dark	144-168	144	60	Total distance moved	camera/Ethovision	96 well plate	E3 media	0.01	Wik wild type	ANOVA
Martinez et al 2018	levetiracetam	102767-28-2		anticonvulsant drug	Inhibits volatge dependent calcium channel	50, 100	-	-	LMR	infrared illumination	120-121	120	15	Total distance moved	multichannel ADC system	96 well plate	E3 media	-	-	Anova/Dunnetts test
van Wouderberg et al 2014	levetiracetam	102767-28-2		anticonvulsant drug	Inhibits volatge dependent calcium channel	20000, 40000, 60000, 80000, 100000, 120000, 140000	60000	60000, 80000, 100000, 120000, 140000	LMR (light/dark)	60000, dark; 80000, 100000, 120000, 140000, light	2-100	2	45	distance moved/15mins	zebrabox	96 well plate	aquarium water	0.002	AB wildtype	mixed model/dunnetts test
Fetter et al 2015	Methimazole	60-56-0		Thioureylene antithyroid drug	binds to thyroid peroxidase to inhibit conversion of iodide to iodine	10, 100, 1000, 10000, 100000	5200	-	LMR (light/dark)	light+dark	48-120	48	20	total distance moved	zebrabox	crystallization dish	Embryo media (EM)	not given	OBI wildtype	log logistic dose response model
Reif et al 2016	Methimazole	60-56-0		Thioureylene antithyroid drug	binds to thyroid peroxidase to inhibit conversion of iodide to iodine	0.0064, 0.064, 0.64, 64	-	-	PMR		6-24	6	0.83	Movement index	PMR analysis tool (PRAT)	96 well plate	Embryo media (EM)	0.0064	Tropical 5D wildtype	percent change&Kolmogorov-smirnov/Bonferronni
Selderslaghs et al 2013	Methimazole	60-56-0		Thioureylene antithyroid drug	binds to thyroid peroxidase to inhibit conversion of iodide to iodine	70, 140, 280	70	-	LMR	dark	4-144	4	5	Total duration movement	Tracksys system/ethovision	48 well plate	reconstituted water	0.001	wild type	overlap area/effect percentage
Selderslaghs et al 2013	Methimazole	60-56-0		Thioureylene antithyroid drug	binds to thyroid peroxidase to inhibit conversion of iodide to iodine	1095, 2190, 4380	-	-	STC		4-24	4	5	Frequency of spontaneous activiy	Camera/Ethovision	48/96 well plate	reconstituted water	0.001	wild type	overlap area/effect percentage
Ali et al 2012	Nicotine	54-11-5		Alkaloid	Nicotinic acetylcholinesterase receptor agonist	6.2, 62, 124, 248	62, 124, 248	-	LMR (light/dark)	light/dark	24-96	24	8	Total distance moved	zebrabox	96 well plate	Hanks solution	-	AB wildtype	Anova/Dunnetts test	no adequate statistical control of difference between control and treatments; no control of malformation effects; inconsistent control groups
Bugel and Tanguay 2018	Nicotine	54-11-5		Alkaloid	Nicotinic acetylcholinesterase receptor agonist	1, 10, 100	10	1	LMR		120-125	120	300	Total distance moved	zebrabox	96 well plate	embryo medium	0.001	Tropical 5D wildtype	two way repeated measure anova/Tukey	dechorionation
Leuthold et al 2019	Nicotine	54-11-5		Alkaloid	Nicotinic acetylcholinesterase receptor agonist	10, 15, 20, 30, 40, 60, 80, 121, 161, 242	60, 80, 121, 161, 242	10	LMR (light/dark)	light+dark	96-118.5	96	80	Total distance moved	zebrabox	96 well plate	ISO water	0.1% methanol	OBI wildtype	confidence interval estimation
Mora-Zamorano et al 2016	Nicotine	54-11-5		Alkaloid	Nicotinic acetylcholinesterase receptor agonist	30, 60, 120, 240	-	30, 60, 120, 240	LMR		48-48.1	48	5	Total distance moved	webcam/matlab toolbox	polystyrene weighing boat	E2 embryo media	-	Ekkwill wildtype	Anova/Holm-sidak	dechorionation
Raftery et al 2014	Nicotine	54-11-5		Alkaloid	Nicotinic acetylcholinesterase receptor agonist	0 .09, 0.19, 0.39, 0.78, 1.56, 3.13, 6.3, 12.5, 25, 50	-	-	STC		5 -25	5	0.1	Spontaneous activity	imageXpress Micro/Ethovision	386 well plate	Embryo media (EM)	0.001	transgenic zebrafish	Kruskal-wallis/Mann-whitney
Reif et al 2016	Nicotine	54-11-5		Alkaloid	Nicotinic acetylcholinesterase receptor agonist	0.0064, 0.064, 0.64, 64	-	-	PMR		6-24	6	0.83	Movement index	PMR analysis tool (PRAT)	96 well plate	Embryo media (EM)	0.0064	Tropical 5D wildtype	percent change&Kolmogorov-smirnov/Bonferronni
Thomas et al 2009	Nicotine	54-11-5		Alkaloid	Nicotinic acetylcholinesterase receptor agonist	5, 10, 15 30	-	5, 10, 15 30	STC		22-22.1	22	5	Frequency of spontaneous activiy	camera/microscope	petridish	embryo medium	-	TL, AB, WIK	Anova/Holm-sidak	dechorionation
Afrikanova et al 2013	Pentylenetetrazole (PTZ)	54-95-5	173001	convulsant drug	Inhibiting GABAa receptor	20000	-	20000	LMR	dark	168-168.1	168	30	Average distance moved	zebrabox	96 well plate	Embryo media (EM)	0.01	Ekkwill	Anova/Dunnetts test
Baraban et al 2005	Pentylenetetrazole (PTZ)	54-95-5	173000	convulsant drug	Inhibiting GABAa receptor	15000	-	15000	LMR	NG	168-168.1	168	2	Total distance moved	Camera/Ethovision	96 well plate	Ringers solution	-	TL	Not given	single concentration
Baxendale et al 2012	Pentylenetetrazole (PTZ)	54-95-5	173000	convulsant drug	Inhibiting GABAa receptor	1250, 2500, 5000, 10000, 20000, 40000, 80000	-	10000, 20000, 40000	LMR (light/dark)	light+dark	96-96.1	96	10	Total distance moved	zebrabox	48 well plate	E3 media	-	not given	Anova/Dunnetts test	no observable effect at 80000
Berghmans et al 2007	Pentylenetetrazole (PTZ)	54-95-5	173000	convulsant drug	Inhibiting GABAa receptor	5000, 10000, 15000, 20000, 25000, 30000	-	10000	LMR	dark	144-168	144	60	Total distance moved	camera/Ethovision	96 well plate	E3 media	0.01	Wik wild type	ANOVA
Bugel and Tanguay 2018	Pentylenetetrazole (PTZ)	54-95-5	173011	convulsant drug	Inhibiting GABAa receptor	1, 10, 100, 1000	-	-	LMR	light	120-125	120	300	Total distance moved	zebrabox	96 well plate	embryo medium	0.001	Tropical 5D wildtype	two way repeated measure anova/Tukey	dechorionation
Ellis and Soanes 2012	Pentylenetetrazole (PTZ)	54-95-5	173000	convulsant drug	Inhibiting GABAa receptor	1000, 2500, 5000, 10000	-	2500	LMR	NG	120-122.3	120	140	Total distance moved	zebrabox	48/96 well plate	E3 media	0.001	AB/Tubingen	Anova/Tukey
Ellis et al 2012	Pentylenetetrazole (PTZ)	54-95-5	173000	convulsant drug	Inhibiting GABAa receptor	1000, 2500, 5000, 10000	1000, 2500, 5000, 10000	5000, 10000	LMR (light/dark)	1000, 2500, 5000 dark; 5000, 10000, light	120-128	120	110	Total distance moved	zebrabox	96 well plate	E3 media	0.001	AB/Tubingen	ANOVA	Gradual reversal of light/dark activity (biphasic) for 5000
Li et al 2018	Pentylenetetrazole (PTZ)	54-95-5	173003	convulsant drug	Inhibiting GABAa receptor	1000, 2000, 4000, 8000, 16000	16000, dark	4000, 8000, light	LMR (light/dark)	16000, dark; 4000, 8000, light	168-169.1	168	15	Average distance moved	zebrabox	24 well plate	sterile water	-	AB strain	two way repeated measure anova
Long et al 2014	Pentylenetetrazole (PTZ)	54-95-5	173004	convulsant drug	Inhibiting GABAa receptor	2500, 5000, 10000, 20000, 40000	-	10000	LMR (light/dark)	light+dark	120-122	120	70	Total distance moved	zebrabox	96 well plate	E3 media	not given	AB strain	Repeated measures anova
Peng et al 2016	Pentylenetetrazole (PTZ)	54-95-5	173005	convulsant drug	Inhibiting GABAa receptor	1000, 2000, 4000, 8000, 16000	-	8000, 16000	LMR	light	120-120.8	120	40	Average distance moved	zebrabox	24 well plate	sterile water	-	AB strain	Anova/Bonferroni
Peng et al 2016	Pentylenetetrazole (PTZ)	54-95-5	173007	convulsant drug	Inhibiting GABAa receptor	1000, 2000, 4000, 8000, 16000	-	4000, 8000, 16000	LMR	light	168-168.8	168	40	Average distance moved	zebrabox	24 well plate	sterile water	-	AB strain	Anova/Bonferroni
Peng et al 2016	Pentylenetetrazole (PTZ)	54-95-5	173006	convulsant drug	Inhibiting GABAa receptor	1000, 2000, 4000, 8000, 16000	4000	8000, 16000	LMR (light/dark)	4000, dark; 8000, 16000, light	120-121.1	120	15	Average distance moved	zebrabox	24 well plate	sterile water	-	AB strain	Anova/Bonferroni
Peng et al 2016	Pentylenetetrazole (PTZ)	54-95-5	173008	convulsant drug	Inhibiting GABAa receptor	1000, 2000, 4000, 8000, 16000	16000	4000, 8000	LMR (light/dark)	16000, dark; 4000, 8000, light	168-169.1	168	15	Average distance moved	zebrabox	24 well plate	sterile water	-	AB strain	Anova/Bonferroni
Steele et al 2018	Pentylenetetrazole (PTZ)	54-95-5	173010	convulsant drug	Inhibiting GABAa receptor	18, 188, 941, 1882, 7237	941, 1882, dark	7237, light	LMR (light/dark)	941, 1882, dark; 7237, light	6-96	6	50	Total distance moved	zebrabox	beaker	reconstituted water	0.0001	Tropical 5D wildtype	Anova/Dunnetts test
Torres Hernandez et al 2016	Pentylenetetrazole (PTZ)	54-95-5	173000	convulsant drug	Inhibiting GABAa receptor	7500	7500, dark	7500, light	LMR (light/dark)	light	144-141.8	144	80	Total distance moved	zebrabox	48 well plate	Instant ocean salt	-	wild type	modified Brown and Forsythe tests	single concentration
Yang et al 2017	Pentylenetetrazole (PTZ)	54-95-5	173009	convulsant drug	Inhibiting GABAa receptor	1000, 2000, 4000, 8000, 16000	4000, 8000, 16000, dark	8000, light	LMR (light/dark)	4000, 8000, 16000, dark; 8000, light	120-120.6	120	10	Total distance moved	zebrabox	24 well plate	egg water	-	wild type	two way repeated measure anova/Tukey
Bailey et al 2016	Retinoic acid	302-79-4		Retinoid	Retinoic acid receptor agonist	0.00002, 0.0002, 0.002	-	0.0002	LMR (light/dark)	light+dark	4-120	4	50	Total distance moved	Noldus recording system/ethovision	petridish	aquarium water	0.0001	AB	Repeated measure anova/Dunnett	Imaging at 6dpf; daily renewal of solution
Reif et al 2016	Retinoic acid	302-79-4		Retinoid	Retinoic acid receptor agonist	0.0064, 0.064, 0.64, 64	-	-	PMR		6-24	6	0.83	Movement index	PMR analysis tool (PRAT)	96 well plate	Embryo media (EM)	0.0064	Tropical 5D wildtype	percent change&Kolmogorov-smirnov/Bonferronni
Wang et al 2014	Retinoic acid	302-79-4		Retinoid	Retinoic acid receptor agonist	0.002	-	0.002	LMR (light/dark)	light/dark	3-96	3	50	speed	zebrabox	24 well plate	embryo medium	0.001	wild type	Anova/Dunnetts test	test at 120hpf
Wang et al 2014	Retinoic acid	302-79-4		Retinoid	Retinoic acid receptor agonist	0.002, 0.008	-	0.002, 0.008	STC		3-27	3	1	Spontaneous activity	camera	96 well plate	embryo medium	0.001	wild type	Anova/Dunnetts test
Bailey et al 2016	valproate	99-66-1	13903	anticonvulsant drug	Inhibition of GABA transminase or voltage gated sodium channel	0.5, 5, 15, 30, 50	30, 50	15	LMR (light/dark)	15, light; 30, dark	4-120	4	50	Total distance moved	Noldus recording system/ethovision	petridish	aquarium water	-	AB	Repeated measure anova/Dunnett	Imaging at 6dpf; daily renewal of solution
Berghmans et al 2007	valproate	1069-66-5		anticonvulsant drug	Inhibition of GABA transminase or voltage gated sodium channel	300, 1000, 3000	3000	-	LMR	dark	144-168	144	60	Total distance moved	camera/Ethovision	96 well plate	E3 media	0.01	Wik wild type	ANOVA
Bugel and Tanguay 2018	valproate	99-66-1		anticonvulsant drug	Inhibition of GABA transminase or voltage gated sodium channel	1, 10, 100, 1000	-	1000	LMR	light	120-121	120	60	Total distance moved	zebrabox	96 well plate	embryo medium	0.001	Tropical 5D wildtype	two way repeated measure anova/Tukey	dechorionation
Cowden et al 2012	valproate	99-66-1	13900	anticonvulsant drug	Inhibition of GABA transminase or voltage gated sodium channel	4, 20, 40, 60, 80, 100	80, 100	20, 40, 60	LMR (light/dark)	dark	6-96	6	50	Total distance moved	Noldus recording system/ethovision	96 well plate	Hanks solution	0.004	wild type	Repeated measures anova
Li et al 2018	valproate	1069-66-5		anticonvulsant drug	Inhibition of GABA transminase or voltage gated sodium channel	1, 4, 20, 100, 500	100, 500	-	LMR (light/dark)	light	168-169.1	168	15	Average distance moved	zebrabox	24 well plate	sterile water	-	AB strain	two way repeated measure anova
Martinez et al 2018	valproate	99-66-1	13901	anticonvulsant drug	Inhibition of GABA transminase or voltage gated sodium channel	50, 100	-	-	LMR	infrared illumination	120-121	120	15	Total distance moved	multichannel ADC system	96 well plate	E3 media	-	-	Anova/Dunnetts test
Reif et al 2016	valproate	99-66-1	13900	anticonvulsant drug	Inhibition of GABA transminase or voltage gated sodium channel	0.0064, 0.064, 0.64, 64	64	-	PMR		6-24	6	0.83	Movement index	PMR analysis tool (PRAT)	96 well plate	Embryo media (EM)	0.0064	Tropical 5D wildtype	percent change&Kolmogorov-smirnov/Bonferronni
Torres Hernandez et al 2016	valproate	99-66-1	13901	anticonvulsant drug	Inhibition of GABA transminase or voltage gated sodium channel	500, 1000, 2000, 3000	2000, 3000	-	LMR (light/dark)	dark	144-145.8	144	80	Total distance moved	zebrabox	48 well plate	Instant ocean salt	-	wild type	modified Brown and Forsythe tests
van Woudenberg et al 2014	valproate	1069-66-5		anticonvulsant drug	Inhibition of GABA transminase or voltage gated sodium channel	30, 60, 150	150, dark	150, light	LMR (light/dark)	light/dark	2-100	2	45	distance moved/15mins	zebrabox	96 well plate	aquarium water	0.002	AB wildtype	mixed model/dunnetts test
Zellner et al 2011	valproate	99-66-1	13900	anticonvulsant drug	Inhibition of GABA transminase or voltage gated sodium channel	48	-	48	LMR (light/dark)	dark	0-48	0	40	Total distance moved	Noldus recording system/ethovision	12/96 well plate	Hanks solution	0.002	wild type	repeated measure anova	single conc exposure; imaging at 6dpf
Zimmermann et al 2015	valproate	99-66-1	13902	anticonvulsant drug	Inhibition of GABA transminase or voltage gated sodium channel	48	-	48	LMR	NG	0-48	0	5	Total distance moved	webcam	6 well plate	water	-	wild type	Anova/Tukey	imaging at dpf
Dach et al 2019	valproate	99-66-2	13903	anticonvulsant drug	Inhibition of GABA transminase or voltage gated sodium channel	0.3, 1, 3, 10, 30	-	-	LMR (light/dark)	dark	6-120	6	35	Total distance moved	Noldus recording system/ethovision	96 well plate	embryo medium	0.005	Tropical 5D wildtype	Kruskal-wallis/Bonferroni test

## Sheet: Table 3_Chemical comparisonn
Chemical	Number of entries per Chemical	Mode of action	Expected activity based on mode of action	Q1: Do similar methods give consistent activity (hyper or hypo)?	Q2: Do different methods give consistent activity (hyper or hypo)?	Q3: Regardless of the method used, is the observed activity consistent with the expected activity?	Q4: Are effect concentrations varying within a factor of 10 when hypo- or hyper-activity is consistent between studies?	Risk of Bias factors	Behavioral test method	References
Aconitine	3	Activation of voltage gated sodium ion channel	Hyperactivity	No	Yes	Yes. LMR(L/D)=1/2; PMR=1/1	Yes	Exposure duration	PMR; LMR (L/D)	Elis et al 2012; Ali et al 2012; Kokel et al 2010
Chlorpyrifos	22	Acetylcholinesterase Inhibitor	Hyperactivity	Yes for STC	No	Yes. STC=2/2; PMR=0/1; LMR=1/10; LMR(L/D)=2/9	No	Exposure duration; Exposure concentration; Endpoint parameter	STC; PMR; LMR(L/D); LMR	Richendrfer et al 2012; Kienle et al 2009; Watson et al 2014; Yen et al 2011; Levin et al 2004; Selderslaghs et al 2010; Reif et al 2016; Cao et al 2018; Jarema et al 2015; Jin et al 2015; Sun et al 2016; Bugel and Tanguay 2018; Li et al 2018; Glazer et al 2017; Oliveri et al 2015; Dach et al 2019
Diazinon	12	Acetylcholinesterase Inhibitor	Hyperactivity	No: Some studies show no effect	No	Yes. STC=0/2; PMR=0/1; LMR=0/3; LMR(L/D)=1/6	No	Exposure concentration; Developmental stage; Endpoint parameter; Exposure duration	STC; PMR; LMR; LMR(L/D)	Watson et al 2014; Velki et al 2017; Kristofco et al 2016; Scheil et al 2008; Yen et al 2011; Steele et al 2018; Reif et al 2016; Leuthold et al 2019; Cao et al 2018; Schmitt et al 2019
Endosulfan	4	GABA-gated chloride channel antagonist	Hyperactivity	Yes	No	Yes: STC=0/1; PMR=0/1; LMR(L/D)=2/2	No	Exposure duration; Endpoint parameter; developmental stage	PMR; STC; LMR(L/D)	Reif et al 2016; Raftery et al 2015; Dale et al 2017; Leuthold et al 2019
Isoproterenol	4	Beta-adrenergic receptor agonists	Hyperactivity	Yes	No	Yes. PMR=3/3; LMR(L/D)=0/1	Yes	Developmental stage; Exposure concentration	PMR; LMR(L/D)	Kokel et al 2010; Copmans et al 2016; Gauthier and Vijayan 2018
Nicotine	7	Nicotinic acetycholine receptor agonist	Hyperactivity	Yes for LMR	Yes	Yes: STC=1/2; PMR=0/1; LMR=2/2; LMR(L/D)=1/2	No	Exposure duration; Endpoint parameter; Analysis duration	STC; PMR; LMR; LMR(L/D)	Ali et al 2012; Reif et al 2016; Raftery et al 2014; Bugel and Tanguay 2018; Mora-Zamorano et al 2016; Leuthold et al 2019
Pentylenetetrazole (PTZ)	16	Inhibiting GABAa receptor	Hyperactivity	Yes	Yes	yes. LMR=7/8; LMR(L/D)=9/9	Yes	Light conditions; Exposure concentration	LMR; LMR(L/D)	Berghmans et al 2007; Baraban et al 2005; Elis and Soanes 2012; Baxendale et al 2012; Elis et al 2012; Torres Hernandez et al 2016; Afrikanova et al 2013; Li et al 2018; Long et al 2014; Peng et al 2016; Yang et al 2017; Steele et al 2018; Bugel and Tanguay 2018
Abamectin	5	Activation of GABA gated chloride channel; Glutamate gated chloride channel	Hypoactivity	Yes	Yes	Yes. STC=4/4; PMR=1/1	No	Material used for exposure vessel	STC; PMR	Raftery et al 2014, 2015; Reif et al 2016; Weichert et al 2017; Vliet et al 2017; Reif et al 2016
Carbamazepine	6	Sodium channel blocker	Hypoactivity	Yes	Yes	Yes. STC=1/1; PMR=0/1; LMR=2/3; LMR(L/D)=1/1	Yes	Exposure duration; Exposure concentration	STC; PMR; LMR; LMR(L/D)	Reif et al 2016; Berghmans et al 2007; Weichert et al 2017; Martinez et al 2018; Bugel and Tanguay 2018; Van Wouderberg 2014
Diazepam	5	Stimulates GABA receptor	Hypoactivity	Yes	Yes	Yes. PMR=2/2; LMR=1/1; LMR(L/D)=1/2	No	Exposure concentration; Exposure duration; Endpoint parameter	PMR; LMR; LMR(L/D)	Steenbergen et al 2011; Berghmans et al 2007; Copmans et al 2016; Kokel et al 2010; Dach et al 2019
Emamectin Benzoate	3	Activation of GABA gated chloride channel; Glutamate gated chloride channel	Hypoactivity	Yes	Yes	Yes. STC=2/2; PMR=1/1	No	Exposure well size; Endpoint parameter	STC; PMR	Reif et al 2016; Weichert et al 2017; Raftery et al 2014
Levatiracetam	3	Inhibiting voltage dependent calcium channel	Hypoactivity	No	Yes	Yes. LMR=1/2; LMR(L/D)=1/1	Yes	Exposure duration; Developmental stage; Exposure concentration; Light conditions	LMR; LMR(L/D)	Berghmans et al 2007; Martinez et al 2018; van Wouderberg et al 2014
Valproate	12	Inhibition of GABA transminase or voltage gated sodium channel	Hypoactivity	No	Yes	Yes. PMR=1/1; LMR=1/4; LMR(L/D)=5/7	No	Exposure concentration; Exposure duration	PMR; LMR(L/D); LMR	Cowden et al 2012; Zellner et al 2011; Torres Hernandez et al 2016; reif et al 2016; Martinez et al 2018; Zimmermann et al 2015; Bailey et al 2016; van Wouderberg et al 2014; Li et al 2018; Berghmans et al 2007; Bugel and Tanguay 2018; Dach et al 2019
Acetaminophen	9	cyclooxygenase Inhibitors	Not clear	No	No	NA	NA	Exposure duration; Exposure concentration; developmental stage	STC; PMR; LMR; LMR(L/D)	Reif et al 2016; Reuter et al 2016; Selderslaghs et al 2013; Xia et al 2017; Dach et al 2019
Apomorphine	4	stimulation of post-synaptic dopamine D2-type receptors	Not clear	Yes	Yes	Yes. PMR=2/2; LMR=1/1; LMR(L/D)=1/1	No	Light conditions; Developmental stage	PMR, LMR, LMR(L/D)	Kokel et al 2010; Copmans et al 2017; Ek et al 2016; Irons et al 2013
Haloperidol	4	Dopamine receptor antagonist	Not clear	Yes	No	NA	Yes	Endpoint parameter; Exposure concentration; Developmental stage; zebrafish strain	LMR; LMR(L/D); PMR	Giacomini et al 2006; irons et al 2013; reif et al 2016; Oliveri and Levin 2019
Methimazole	4	binds to thyroid peroxidase to inhibit conversion of iodide to iodine	Not clear	NA	Yes	NA	No	Exposure duration	STC; PMR; LMR; LMR(L/D)	Selderslaghs et al 2013; fetter et al 2015; Reif et al 2016
Retinoic acid	4	Retinoic acid receptor agonist	Not clear	Yes	Yes	NA	Yes	Endpoint parameter	STC; PMR; LMR(L/D)	Wang et al 2014; Bailey et al 2016; Reif et al 2016
